# Supplementary material for: Hip survival rate in the patients with avascular necrosis of femoral head after transtrochanteric rotational osteotomy: a systematic review and meta-analysis
Source: PubMed Central journal article supplement — Chin Med J (Engl). 2019 Dec 20;132(24):2960-2971. doi: 10.1097/CM9.0000000000000562 (PMC6964954; doi:10.1097/cm9.0000000000000562), 2019-12-20
Supplement: cm9-132-2960-s001.pdf [file cm9-132-2960-s001.pdf]

**Supplementary Table 1. Quality assessment of cohort studies.**

| Study (authors, year) | Representativeness of the exposed cohort | Selection of the non exposed cohort | Ascertainment of exposure | Demonstration that outcome of interest was not present at start of study | Comparability of cohorts on the basis of the design or analysis | Assessment of outcome | Was follow-up long enough for outcomes to occur | Adequacy of follow up of cohorts |
|-----------------------|------------------------------------------|-------------------------------------|---------------------------|--------------------------------------------------------------------------|-----------------------------------------------------------------|-----------------------|-------------------------------------------------|----------------------------------|
| Morita et al, 2017    | Yes                                      | NA                                  | Yes                       | Yes                                                                      | NA                                                              | Yes                   | Yes                                             | Yes                              |
| Kubo et al, 2017      | Yes                                      | NA                                  | Yes                       | Yes                                                                      | NA                                                              | Yes                   | Yes                                             | Yes                              |
| Sonoda et al, 2015    | Yes                                      | NA                                  | Yes                       | Yes                                                                      | NA                                                              | Yes                   | Yes                                             | Yes                              |
| Zhao et al, 2013      | Yes                                      | NA                                  | Yes                       | Yes                                                                      | NA                                                              | Yes                   | Yes                                             | Yes                              |
| Zhao et al, 2012      | Yes                                      | NA                                  | Yes                       | Yes                                                                      | NA                                                              | Yes                   | Yes                                             | Yes                              |
| Ha et al, 2010        | Yes                                      | NA                                  | Yes                       | Yes                                                                      | NA                                                              | Yes                   | Yes                                             | Yes                              |
| Motomura et al, 2010  | Yes                                      | NA                                  | Yes                       | Yes                                                                      | NA                                                              | Yes                   | Yes                                             | Yes                              |
| Biswal et al, 2009    | Yes                                      | NA                                  | Yes                       | Yes                                                                      | NA                                                              | Yes                   | Yes                                             | Yes                              |
| Rijnen et al, 2005    | Yes                                      | NA                                  | Yes                       | Yes                                                                      | NA                                                              | Yes                   | Yes                                             | Yes                              |
| Langlais et al, 2004  | Yes                                      | NA                                  | Yes                       | Yes                                                                      | NA                                                              | Yes                   | Yes                                             | Yes                              |
| Hisatome et al, 2004  | Yes                                      | NA                                  | Yes                       | Yes                                                                      | NA                                                              | Yes                   | Yes                                             | Yes                              |
| Koo et al, 2000       | Yes                                      | NA                                  | Yes                       | Yes                                                                      | NA                                                              | Yes                   | Yes                                             | Yes                              |
| Iwasada et al, 1997   | Yes                                      | NA                                  | Yes                       | Yes                                                                      | NA                                                              | Yes                   | Yes                                             | Yes                              |
| Dean et al, 1993      | Yes                                      | NA                                  | Yes                       | Yes                                                                      | NA                                                              | Yes                   | Yes                                             | Yes                              |
| Inao et al, 1990      | Yes                                      | NA                                  | Yes                       | Yes                                                                      | NA                                                              | Yes                   | Yes                                             | Yes                              |

NA: not available.

**Supplementary Table 2. Quality assessment of case-control studies.**

| Study (authors, year) | Is the case definition adequate? | Representativeness of the cases | Selection of Controls | Definition of Controls | Comparability of cases and controls on the basis of the design or analysis | Ascertainment of exposure | Same method of ascertainment for cases and controls | Non-Response rate |
|-----------------------|----------------------------------|---------------------------------|-----------------------|------------------------|----------------------------------------------------------------------------|---------------------------|-----------------------------------------------------|-------------------|
| Kawano et al, 2018    | Yes                              | Yes                             | Yes                   | Yes                    | Yes                                                                        | Yes                       | Yes                                                 | NA                |
| Lee et al, 2017       | Yes                              | Yes                             | Yes                   | Yes                    | Yes                                                                        | Yes                       | Yes                                                 | NA                |
| Hasegawa et al, 2003  | Yes                              | Yes                             | Yes                   | Yes                    | Yes                                                                        | Yes                       | Yes                                                 | NA                |
| Schneider et al, 2002 | Yes                              | Yes                             | Yes                   | Yes                    | Yes                                                                        | Yes                       | Yes                                                 | NA                |

NA: not available.
